# Supplementary material
Source: publisher figshare collection journal article supplement (https://karger.figshare.com/ndownloader/files/8730904)
Supplement: Supplementary file 1 [file 8730904]

**Supplementary Figure 1.** Quantitative data showing weight **(a)** and blood glucose levels **(b)** at the end of the study. **(c)** Renal Pathology**:** Kidney cortex sections of lean control and diabetic rats stained with trichrome. ZDF rat kidney shows glomerular lobulation (→),Dilatation of Bowmann's space (*) and mesanglial expansion. **(d)**. Graphical represenation of BUN/creatinine ratio in serum. ZDF animals show increased ratio compared to control or GLC groups. Data are expressed as means ± SE.
